# Supplementary material
Source: publisher site journal article supplement (https://static.cambridge.org/content/id/urn:cambridge.org:id:article:S1935789320002888/resource/name/S1935789320002888supp001.docx)
Supplement: Supplementary file 1 [file S1935789320002888supp001.docx]

| Container 1 |  |  |  |
| --- | --- | --- | --- |
| Article Code | Amount | Product Name | Manufacturer |
| JE601 | 1 | Sterilization container lid | Aesculap, Tuttlingen, Germany |
| JE606 | 1 | Sterilization container bottom 588X398X119MM | Aesculap, Tuttlingen, Germany |
| JE145R | 1 | Steel basket 485X344X50MM ISO 1/1 CONT. | Aesculap, Tuttlingen, Germany |
|  |  | Left to right |  |
| BF058R | 2 | Sponge Forceps MAIER with rachet straight 265MM | Aesculap, Tuttlingen, Germany |
| BF059R | 4 | Sponge Forceps MAIER with rachet curved 262MM | Aesculap, Tuttlingen, Germany |
| BJ048R | 4 | Dissecting Forceps ZENKER curved 290MM | Aesculap, Tuttlingen, Germany |
| BJ070R | 1 | Dissecting Forceps LAWRENCE 270MM | Aesculap, Tuttlingen, Germany |
| BJ026R | 2 | Dissecting Forceps OVERHOLT GEISSENDOERFER.#6 226MM | Aesculap, Tuttlingen, Germany |
| BJ045R | 2 | Dissecting Forceps Rumel, 23CM | Aesculap, Tuttlingen, Germany |
| BJ043R | 1 | Dissecting Forceps RUMEL #3 241MM | Aesculap, Tuttlingen, Germany |
| BJ021R | 2 | Dissecting Forceps OVERHOLT-GEISSENDOERFER.#1 209MM | Aesculap, Tuttlingen, Germany |
| BJ012R | 2 | Dissecting Forceps BABY MIXTER 180MM | Aesculap, Tuttlingen, Germany |
| BC289R | 1 | Dissecting Scissors DUROTIP NELSON-METZB.305MM | Aesculap, Tuttlingen, Germany |
| BC265R | 1 | Dissecting Scissors METZENBAUM curved | Aesculap, Tuttlingen, Germany |
| BC776R | 1 | Abdominal Scissoris curved ST/ST 180MM | Aesculap, Tuttlingen, Germany |
| BC265W | 1 | DUROTIP Wavecut Dissecting Scissors curved Metzenbaum.200MM | Aesculap, Tuttlingen, Germany |
| BC261R | 1 | DUROTIP Dissecting Scissors METZENBAUM 145MM | Aesculap, Tuttlingen, Germany |
| BC259R | 1 | DUROTIP Dissecting Scissors BABY-METZB.GEB.145MM | Aesculap, Tuttlingen, Germany |
| BC177R | 1 | Dissectin Scissors JAMESON curved 150 MM | Aesculap, Tuttlingen, Germany |
| BC664R | 1 | Scissors DIETHRICH HEGEMANN 55°180MM | Aesculap, Tuttlingen, Germany |
| BM090R | 1 | DUROGRIP Needle Holder MASSON 265MM | Aesculap, Tuttlingen, Germany |
| BM037R | 1 | DUROGRIP Needle Holder DE'BAKEY 250MM | Aesculap, Tuttlingen, Germany |
| BM077R | 1 | DUROGRIP Needle Holder HEGAR 206MM | Aesculap, Tuttlingen, Germany |
| BM022R | 1 | DUROGRIP Needle Holder HEGAR-MAYO-SEELEY | Aesculap, Tuttlingen, Germany |
| BM112R | 1 | DUROGRIP Wire Twister BAUMGARTNER 200MM | Aesculap, Tuttlingen, Germany |
| FB534R | 1 | Hemostatic Forceps DE'BAKEY-PEAN straight 99/280MM | Aesculap, Tuttlingen, Germany |
| FB473R | 1 | Hemostatic Forceps DE'BAKEY 130/315MM | Aesculap, Tuttlingen, Germany |
| FB481R | 1 | Hemostatic ForcepsE DE´BAKEY 270MM | Aesculap, Tuttlingen, Germany |
| FB500R | 1 | Hemostatic Forceps DE´BAKEY 38/85/220MM | Aesculap, Tuttlingen, Germany |
| FB503R | 1 | Hemostatic Forceps DE´BAKEY 58/103/270MM | Aesculap, Tuttlingen, Germany |
| FB485R | 1 | Dissecting and Ligature Forceps DE'BAKEY 230MM | Aesculap, Tuttlingen, Germany |
| FB561R | 1 | Anastomosis Clamp DERRA 175MM | Aesculap, Tuttlingen, Germany |
| FB466R | 2 | Peripheral Vascular Clamp DE´BAKEY 180MM | Aesculap, Tuttlingen, Germany |
| EA205R | 2 | Intestinal Clamp KOCHER curved250MM | Aesculap, Tuttlingen, Germany |
| EA062R | 1 | Intestinal Clamp COLLIN 230MM | Aesculap, Tuttlingen, Germany |
| BJ314R | 2 | PERITONEUM Forceps MIKULICZ 205MM | Aesculap, Tuttlingen, Germany |
| EA020R | 2 | Intestinal Clamp ALLIS THOMS 6X7Z.200MM | Aesculap, Tuttlingen, Germany |
| FD628R | 1 | Applying Forceps for vessel clip 190MM | Aesculap, Tuttlingen, Germany |
| BH445R | 2 | Hemostatic Forceps ROCHESTER-PEAN curved 185MM | Aesculap, Tuttlingen, Germany |
| BH642R | 2 | Hemostatic Forceps KOCHER-OCHSN.straight.1X2Z.185MM | Aesculap, Tuttlingen, Germany |
| BH443R | 2 | Hemostatic Forceps ROCHESTER-PEAN curved.160MM | Aesculap, Tuttlingen, Germany |
| BH111R | 4 | Delicate Hemostatic Forceps HALSTED curved. 125 MM | Aesculap, Tuttlingen, Germany |
| BF433R | 2 | Towel Clamp BACKHAUS 135MM | Aesculap, Tuttlingen, Germany |
| LX159R | 1 | Wire Cutters REILL GEB. 175 MM | Aesculap, Tuttlingen, Germany |
| FK324R | 1 | Rasparatorie 14,0MM | Aesculap, Tuttlingen, Germany |
| FK166R | 2 | Bone Lever HOHMANN 17mm, 240mm | Aesculap, Tuttlingen, Germany |
| 20195-110 | 2 | Bipolar Forceps straight 2MM 26CM | Erbe Elektromedizin GmbH, Tübingen, Germany |
| 20195-001 | 1 | Bipolar Forceps curved 19CM, | Erbe Elektromedizin GmbH, Tübingen, Germany |
| 20190-045 | 1 | Electrosurgigcal Pencils | Erbe Elektromedizin GmbH, Tübingen, Germany |
|  |  | at the top crosswise |  |
| BN906R | 1 | REDON-Guide Needle .CHARR.16 | Aesculap, Tuttlingen, Germany |
| BN903R | 1 | REDON-Guide Needle CH.10 thread knife tip | Aesculap, Tuttlingen, Germany |
| 21191-010 | 1 | Monopolar electrode; 2,4x12mm straight; L 125mm; Ø 4mm | Erbe Elektromedizin GmbH, Tübingen, Germany |
| BB075R | 1 | Scaple Handle NR.3L 211MM | Aesculap, Tuttlingen, Germany |
| BN064R | 1 | Myrtle Leaf Probe D:2/145MM | Aesculap, Tuttlingen, Germany |
| FB653R | 1 | Guide only FB651R (Tourniquet) | Aesculap, Tuttlingen, Germany |
| BD561R | 2 | Tissue Forceps 1X2Z. 200 MM | Aesculap, Tuttlingen, Germany |
| BD539R | 2 | Tissue Forceps 1X2Z.160MM | Aesculap, Tuttlingen, Germany |
| FB417R | 2 | Ultra light Forceps DE´BAKEY ML.2,8MM straight 300MM | Aesculap, Tuttlingen, Germany |
| FB404R | 2 | Ultra light ForcepsE DE´BAKEY ML.2,0MM straight.240MM | Aesculap, Tuttlingen, Germany |
| FB402R | 2 | Ultra light Forceps DE'BAKEY ML.2,0MM straight.200MM | Aesculap, Tuttlingen, Germany |
| FB425R | 2 | Bulldog Clamp DE'BAKEY curved 42/97MM | Aesculap, Tuttlingen, Germany |
|  |  | In a tray |  |
| 21191-000 | 1 | Monopolar electrode straight; L 45mm; Ø 4mm | Erbe Elektromedizin GmbH, Tübingen, Germany |
| FB367R | 2 | Mini-Bulldog clamp.20/55MM | Aesculap, Tuttlingen, Germany |
| FD623R | 4 | Vessel Clip 25°25X8X2MM | Aesculap, Tuttlingen, Germany |
| 20192-127 | 1 | MONOPOLAR Connectin Cable, 20190-045, lenght 4m | Erbe Elektromedizin GmbH, Tübingen, Germany |
| 20196-045 | 1 | BIPOLARConnecting Cable VIO, ICC, ACC, STANDARD, for bipolar forceps. Length 4m | Erbe Elektromedizin GmbH, Tübingen, Germany |
|  |  | Tied together |  |
| 1464LL-2 | 1 | Infusion needle straigt Ø 1,5 x 80MM | ACUFIRM, Berlin, Germany |
| 747100-040070 | 3 | Drainage tube, thick 11cm | TELEFLEX, Wayne, PA, USA |
| 747100-035060 | 3 | Drainage tube, thin, 11cm | TELEFLEX, Wayne, PA, USA |
| Container 2 |  |  |  |
| JE601 | 1 | Sterilization Container Lid | Aesculap, Tuttlingen, Germany |
| JE606 | 1 | Sterilization Container Bottom 588X398X119MM | Aesculap, Tuttlingen, Germany |
| JE145R | 1 | Steel Basket 485X344X50MM ISO 1/1 CONT. | Aesculap, Tuttlingen, Germany |
| BT623R | 1 | Retractor MIKULICZ 147X50MM | Aesculap, Tuttlingen, Germany |
| BT494R | 2 | Retractor KOCHER-WAGNER 64X25MM | Aesculap, Tuttlingen, Germany |
| BT370R | 2 | Retractor KOCHER 60X20MM | Aesculap, Tuttlingen, Germany |
| BT326R | 2 | Retractor LANGENBECK 40X13MM | Aesculap, Tuttlingen, Germany |
| BT354R | 2 | Retractor KOCHER LANGENBECK 25X6MM | Aesculap, Tuttlingen, Germany |
| BT248R | 2 | Retractor VOLKMANN 8-sharp 9X40MM | Aesculap, Tuttlingen, Germany |
| BT185R | 1 | Retractor CUSHING 14X18MM | Aesculap, Tuttlingen, Germany |
| FK176R | 2 | Bone Lever 25,0MM 260MM | Aesculap, Tuttlingen, Germany |
| BV209R | 2 | Self-retaining Retractor WEITLANER 5X6Z blunt 255MM | Aesculap, Tuttlingen, Germany |
| BV075R | 2 | Self-retaining Retractor WEITLANER 3X4Z blunt 165MM | Aesculap, Tuttlingen, Germany |
| BT033R | 1 | Retractor ROUX 28X29/33X45MM 165MM | Aesculap, Tuttlingen, Germany |
| BT032R | 1 | Retractor ROUX 25X26/28X38MM 155MM | Aesculap, Tuttlingen, Germany |
| 398.540 | 1 | Ball Spike with pointed ball tip | DePuy Synthes, Umkirch, Germany |
| FL055R | 1 | Mallet OMBREDANNE 550G Head-D:40MM 240MM | Aesculap, Tuttlingen, Germany |
| FK324R | 1 | Raspatorie straight round 14,0MM | Aesculap, Tuttlingen, Germany |
| FK321R | 1 | Raspatorie curved round 6,0MM | Aesculap, Tuttlingen, Germany |
| FB918R | 1 | Sternum Chisel LEBSCHE 200MM | Aesculap, Tuttlingen, Germany |
|  |  | In a bag |  |
| 394.850 | 2 | Carbon fibre rod Ø 11.0 MM, length 300MM | DePuySynthes, Umkirch, Germany |
| 394.840 | 2 | Carbon fibre rod B 11X250MM | DePuySynthes, Umkirch, Germany |
| 294.570 | 4 | SCHANZ Screw. 5MM, 250MM | DePuySynthes, Umkirch, Germany |
| 315.370 | 1 | Drill Bit 3,5MM 195/170 | DePuySynthes, Umkirch, Germany |
| 321.160 | 1 | Combination wrench, 11 mm , L 140 mm | DePuySynthes, Umkirch, Germany |
| 394.160 | 1 | Trocar 3,5MM long | DePuySynthes, Umkirch, Germany |
| 393.790 | 1 | Drill Sleeve 5.0/3.5, long | DePuySynthes, Umkirch, Germany |
| 393.830 | 1 | Drills Sleeve long | DePuySynthes, Umkirch, Germany |
| 390.007 | 2 | Rod-to-Rod Clamp, MR-safe | DePuySynthes, Umkirch, Germany |
| 390.008 | 4 | Clamp, can be mounted, self holding | DePuySynthes, Umkirch, Germany |
|  |  | On top |  |
| FB821R | 1 | Thoracic Retractor (Mercedes) | Aesculap, Tuttlingen, Germany |
| 393.100 | 1 | Universal Chuck with T-handle | DePuySynthes, Umkirch, Germany |
|  |  | Upper steel basket left to right |  |
| JE145R | 1 | Steel Basket 485X344X50MM ISO 1/1 CONT. | Aesculap, Tuttlingen, Germany |
| BT523R | 1 | Wound Retractor CORYLLOS 115X65MM | Aesculap, Tuttlingen, Germany |
| BT672R | 1 | Pelvis Retractor ST.MARKS 60X45MM/174X60MM | Aesculap, Tuttlingen, Germany |
| BV670R | 4 | Abdominal Retractor 64X80MM | Aesculap, Tuttlingen, Germany |
| BV668R | 2 | Abdominal Retractor 48X66MM | Aesculap, Tuttlingen, Germany |
| BV688R | 1 | Abdominal Retractor TURNER-WARWICK D:305MM | Aesculap, Tuttlingen, Germany |
|  |  | In a tray |  |
| JG381R | 1 | DENTAL TRAY TYP 1 273X176X30MM | Aesculap, Tuttlingen, Germany |
| FM588R | 2 | Micro Forceps with round handles without counter balance straight 210MM | Aesculap, Tuttlingen, Germany |
| BD196R | 2 | GERALD DIADUST Micro Forceps with straight handle 200MM | Aesculap, Tuttlingen, Germany |
| FM566R | 1 | GERALD DIADUST Micro Forceps with round handle.210MM | Aesculap, Tuttlingen, Germany |
| FM481R | 1 | Micro Scissors with round handle 165MM | Aesculap, Tuttlingen, Germany |
| FM484R | 1 | Micro Scissors with round handle 60°SP/SP 165MM | Aesculap, Tuttlingen, Germany |
| BH131R | 2 | Hemostatic clamp PROVIDENCE-HOSP curved 140MM | Aesculap, Tuttlingen, Germany |
|  |  | center |  |
| FB882R | 1 | Rib shears SAUERBRUCH 270MM | Aesculap, Tuttlingen, Germany |
| BT560R | 1 | Lung Spatula ALLISON 54MM | Aesculap, Tuttlingen, Germany |
| FB803R | 1 | Rib retractor FINOCHIETTO BL.44X65MM | Aesculap, Tuttlingen, Germany |
| FB822R | 2 | Blade 42 mm x 65 mm | Aesculap, Tuttlingen, Germany |
| FB823R | 2 | Blade 75 mm x 75 mm | Aesculap, Tuttlingen, Germany |
|  |  | On top |  |
| 56-256-05-01 | 1 | Measuring cup, 500 CCM | KLS Martin, Tuttlingen, Germany |
| JG523R | 1 | Round bowl 0,4 LTR. (B6) | Aesculap, Tuttlingen, Germany |
| JG522R | 1 | Round bowl 0,16 LTR. (B4) | Aesculap, Tuttlingen, Germany |
| JG506R | 1 | Kidney tray 250MM | Aesculap, Tuttlingen, Germany |
